# Supplementary material for: Bursts of Vertex Activation and Epidemics in Evolving Networks
Source: PLOS journal article supplement (doi:10.1371/journal.pcbi.1002974), 2013-03-21
Supplement: S1 (10.1371/journal.pcbi.1002974.s001) [file journal.pcbi.1002974.s001]

301 Moved Permanently

# Moved Permanently

The document has moved here.

---

Apache Server at www.ploscompbiol.org Port 80
